# Supplementary material for: Methylation Marks of Blood Leukocytes of Native Hucul Mares Differentiated in Age
Source: Int J Genomics. 2019 Jun 2;2019:2839614. doi: 10.1155/2019/2839614 (PMC6589255; doi:10.1155/2019/2839614)
Supplement: Supplementary Materials — Figure S1: scatter plots (below the diagonal) and pairwise Pearson's correlation values (above the diagonal) of CpG methylation across 12 horse blood samples. Histograms on the diagonal denote the bimodal distribution of methylation patterns across all covered CpG sites. Table S1: characteristic of age DMR sites of horse blood leukocytes including localisation, differential methylation value, CG content, and annotation with the use of the EquCab 2.0 version of reference sequence. Table S2: molecular classification of age DMR-linked genes with the use of Panther v 11.0. Table S3: primer sequences applied for the RT-PCR approach. Table S4: calculation of methylation percent after clone bisulfite sequencing for age DMRs of the STX2 and TIAM1 genes. [file 2839614.f1.zip › Table S1 - S4.xlsx]

## Sheet: Table S1
Table S1. Characteristic of age DMR sites of horse blood leukocytes including localisation, differential methylation value, CG content and annotation with the use of EquCab 2.0 version of reference sequence.
age DMR	Chromosome: Start-stop position (1 kbp sliding window)	DM CpGs No.	Diff.meth.	pvalue	qvalue	CpG percent	Gene ID	Gene symbol	STRAND	Distance to nearest gene [bp]	Consequence	EXON	INTRON
1	1:5632001-5633000	2	29.2404	1.11022e-16	3.12354e-14	65.1723	ENSECAG00000002486	Novel gene	-1	-	start_lost; coding_sequence; 5_prime_UTR; 3_prime_UTR	1[1]	-
2	1:104197001-104198000	3	36.4189	0	0	52.2385	ENSECAG00000021238	IGF1R	-1	-	intron	-	1[19]
3	1:149596001-149597000	1	-32.7413	4.17352e-06	0.000144763	41.0398	ENSECAG00000006704/ ENSECAG00000010114	FAM98B/ RASGRP1	-1/ 1	85584/ 109774	downstream/ upstream	-	-
4	1:170056001-170057000	4	-33.4664	1.16673e-07	6.37609e-06	43.9323	ENSECAG00000025390/ ENSECAG00000004630	U4 (snRNA)/ Novel gene	-1/ 1	221826/ 171501	downstream/ upstream	-	-
5	1:181940001-181941000	1	-27.9678	0.000201834	0.00307868	36.7903	ENSECAG00000007565	MDGA2	-1	124341	upstream	-	-
6	2:2648001-2649000	2	-27.5705	5.36527e-08	3.26048e-06	47.1847	ENSECAG00000011414	DAB1	1	-	intron	-	1[15]
7	2:6831001-6832000	2	25.1234	1.15433e-10	1.30874e-08	32.691	ENSECAG00000021261	ZCCHC11	1	-	start_lost; coding_sequence; 5_prime_UTR	1[29]	-
8	2:8856001-8857000	1	-26.4064	0.00142486	0.0132968	49.3689	ENSECAG00000022281	DMRTA2	1	134	downstream	-	-
9	2:20500001-20501000	2	-25.641	0.000163755	0.00266392	50.5322	ENSECAG00000010275/ ENSECAG00000026543	GRIK3/ U6 (snRNA)	1/ -1	128351/ 151320	upstream/ upstream	-	-
10	2:24044001-24045000	10	34.8572	2.5886e-12	4.0966e-10	57.3418	ENSECAG00000012263	RNF19B	1	14903	upstream	-	-
11	2:43526001-43527000	4	-26.9915	3.88625e-11	5.00356e-09	52.6055	ENSECAG00000020792	CAMTA1	-1	-	intron	-	1[20]
12	3:106819001-106820000	2	-41.5329	5.53905e-10	5.3261e-08	33.4507	ENSECAG00000008556	LDB2	1	-	intron	-	3[7]
13	3:106820001-106821000	2	-55.7073	1.66533e-15	3.83343e-13	37.7241	ENSECAG00000008556	LDB2	1	-	intron	-	3[7]
14	3:113944001-113945000	1	-25.4274	6.57568e-06	0.000201414	63.1702	ENSECAG00000022828	C4orf50	-1	-	intron	-	3[6]
15	4:54852001-54853000	1	-31.8432	3.50577e-08	2.21923e-06	50.089	ENSECAG00000000658	GPNMB	1	-	intron	-	11[12]
16	4:84936001-84937000	1	-31.4159	1.22708e-06	5.388e-05	49.7606	ENSECAG00000016490	Novel pseudogene	-1	1702	upstream	-	-
17	4:85354001-85355000	1	-27.0028	1.04825e-05	0.000296015	45.1589	ENSECAG00000026448	eca-mir-29b	-1	26814	upstream	-	-
18	4:85497001-85498000	3	-27.7199	0	0	38.733	ENSECAG00000026448/ ENSECAG00000024078	eca-mir-29b/ MKLN1	-1/ 1	169813/ 183270	upstream/ upstream	-	-
19	5:19352001-19353000	2	-27.6087	1.34024e-06	5.81762e-05	42.3258	ENSECAG00000002769/ ENSECAG00000002152	ZNF648/ LOC100054852	-1/ 1	117394/ 213648	upstream/ upstream	-	-
20	5:56377001-56378000	1	-31.4438	3.654e-05	0.000860163	50.3858	ENSECAG00000011594	KCND3	1	-	intron	-	1[8]
21	5:70284001-70285000	3	-34.3298	3.46965e-11	4.62393e-09	49.8991	ENSECAG00000020188/ ENSECAG00000021520	CNN3/ SLC44A3	1/ -1	9486/ -	downstream/ intron	-	-/13[14]
22	6:28514001-28515000	4	-30.9654	0.000173925	0.00276977	44.7592	ENSECAG00000019096/ ENSECAG00000018293	DCP1B/ CACNA1C	1/ -1	190450/ 228536	upstream/ upstream	-	-
23	7:2996001-2997000	4	-26.4895	2.0733e-11	2.89395e-09	51.0743	ENSECAG00000009572	PLIN3	-1	13363	upstream	-	-
24	7:19986001-19987000	2	36.3925	1.42192e-09	1.25596e-07	40.6323	ENSECAG00000011348	POU2AF1	-1	-	intron	-	1[4]
25	7:64665001-64666000	1	-29.3808	0.000413467	0.00546227	45.0283	ENSECAG00000007398	Novel gene	-1	435370	downstream	-
26	8:19819001-19820000	2	-30.9741	0.00046498	0.00598663	49.2898	ENSECAG00000024560	PTPN11	-1	17417	downstream	-	-
27	8:28141001-28142000	5	-27.269	0	0	52.0239	ENSECAG00000014615	STX2	-1	675	upstream	-	-
28	9:69549001-69550000	6	26.2975	2.07603e-08	1.39558e-06	57.3537	ENSECAG00000026729/ ENSECAG00000027649	Novel miRNA/ SNORD95 (snoRNA)	-1/ 1	58988/ 123808	downstream/ downstream	-
29	10:45407001-45408000	2	-31.125	5.29941e-06	0.000172033	43.038	ENSECAG00000021315	EPHA7	-1	23036	upstream	-	-
30	10:45824001-45825000	1	-28.3046	9.99557e-05	0.00182522	36.4215	ENSECAG00000012965/ ENSECAG00000021315	Novel pseudogene/ EPHA7	1/ -1	269188/ 440035	downstream/ upstream	-
31	10:56409001-56410000	3	-34.3691	4.9738e-14	1.02114e-11	37.0158	ENSECAG00000013971	ATG5	-1	-	coding_sequence; 3_prime_UTR; intron	7-8[8]	6-7[7]
32	10:71269001-71270000	1	-26.9954	7.68404e-05	0.00147799	35.1007	ENSECAG00000010133	Novel gene	-1	218737	downstream	-	-
33	11:8319001-8320000	2	-28.6885	5.72601e-09	4.48416e-07	53.0289	ENSECAG00000020626	SDK2	1	15969	downstream	-	-
34	11:26015001-26016000	2	-33.9329	1.04361e-14	2.33163e-12	51.7944	ENSECAG00000012454	XYLT2	1	27813	upstream	-	-
35	11:35936001-35937000	3	29.2418	0	0	58.8612	ENSECAG00000025139	MRM1	1	43261	downstream	-	-
36	11:48536001-48537000	3	-35.3558	0	0	53.5908	ENSECAG00000007473	Novel pseudogene	1	13222	upstream	-	-
37	11:51870001-51871000	3	38.0463	0	0	52.4908	ENSECAG00000026819	NTN1	1	-	intron	-	4[9]
38	13:2759001-2760000	1	25.9016	0.00177051	0.0153006	55.0944	ENSECAG00000015536	MMD2/ SLC29A4	1/ -1	6010/ -	upstream/ intron	-	-/1[5]
39	13:10600001-10601000	1	-26.376	0.000856937	0.00937972	55.3397	ENSECAG00000021173	RHBDD2	-1	47090	downstream	-	-
40	13:20366001-20367000	1 (snp_ASM)	-34.1715	2.25819e-13	4.08425e-11	54.0419	ENSECAG00000018734	GSG1L	1	17482	upstream	-	-
41	13:22146001-22147000	1	-32.7664	4.23022e-06	0.000146063	49.5786	ENSECAG00000009376/ ENSECAG00000007423	ZKSCAN2/ AQP8	1/ -1	266198/ 287672	upstream/ downstream	-	-
42	14:9679001-9680000	1	30.1039	1.25825e-07	6.73098e-06	34.7011	ENSECAG00000011756/ ENSECAG00000019045	FGF18/ FBXW11	-1/ 1	129870/ 243951	downstream/ downstream	-	-
43	14:36237001-36238000	2	-28.9417	6.98314e-07	3.31536e-05	46.5042	ENSECAG00000011014/ ENSECAG00000012779	DND1/ IK	1/ -1	2766/ -	downstream/ intron	-	-/17[22]
44	14:42916001-42917000	2	-30.125	2.82811e-06	0.000105242	51.4027	ENSECAG00000008299/ ENSECAG00000009732	IL4/ IL13	-1/ -1	7783/ 3957	upstream/ downstream	-	-
45	14:42917001-42918000	1	-32.1395	0.000230773	0.00342385	55.7314	ENSECAG00000008299/ ENSECAG00000009732	IL4/ IL13	-1/ -1	8783/ 2957	upstream/ downstream	-	-
46	14:60002001-60003000	1	-27.2587	6.33071e-12	9.24804e-10	43.869	ENSECAG00000015637	NREP	1	42599	upstream	-	-
47	14:75078001-75079000	1	-28.1994	0.00232489	0.0186489	41.8589	ENSECAG00000018508	NR2F1	-1	328879	upstream	-	-
48	15:27379001-27380000	1	-36.8421	5.53944e-11	6.89821e-09	36.537	ENSECAG00000000453/ ENSECAG00000011079	GCFC2/ MRPL19	1/ -1	159603/ 222266	upstream/ downstream	-	-
49	16:18994001-18995000	5	-39.4319	7.75924e-10	7.18796e-08	43.3387	ENSECAG00000008974	FOXP1	1	-	intron	-	3[18]
50	17:1942001-1943000	5	-32.8358	2.77349e-09	2.39411e-07	51.4294	ENSECAG00000009862	LATS2	-1	11607	upstream	-	-
51	17:32785001-32786000	1	-26.6029	0.000314217	0.0043796	34.6298	ENSECAG00000016793	Novel gene	1	19142	downstream	-	-
52	18:16606001-16607000	1	-26.032	1.68953e-10	1.80762e-08	39.655	ENSECAG00000005577	GPR39	1	40262	upstream	-	-
53	19:53391001-53392000	11	-26.9322	0	0	50.1959	ENSECAG00000002910/ ENSECAG00000009539	Novel processed pseudogene/ ZPLD1	1/ -1	72261/ 103862	upstream/ upstream	-	-
54	20:29611001-29612000	1	-28.5815	2.22045e-16	6.02397e-14	56.0242	ENSECAG00000023081	GNL1	-1	-	3_prime_UTR; intron	11-12[12]	10-11[11]
55	20:45076001-45077000	2	-27.6478	0.000540763	0.00670112	42.6423	ENSECAG00000019834	CYP39A1	-1	37431	downstream	-	-
56	22:38243001-38244000	1	-28.4799	4.4692e-12	6.65672e-10	52.93	ENSECAG00000015236	TMEM189	-1	-	intron	-	2[5]
57	23:20920001-20921000	1	38.2345	9.64062e-08	5.42465e-06	44.5376	ENSECAG00000021795	C9orf135	-1	-	intron	-	1[3]
58	23:53738001-53739000	6	-33.2871	0	0	54.5206	ENSECAG00000024949/ ENSECAG00000024933	Novel pseudogene/ SPIN1	1/ -1	91425/ 111390	downstream/ upstream	-	-
59	24:10758001-10759000	1	-27.7203	1.35835e-06	5.86272e-05	36.5054	ENSECAG00000013626	Novel gene	1	36498	upstream	-	-
60	24:28192001-28193000	1	-26.3445	0.000684496	0.00792792	36.6043	-	-	-	-	intergenic	-	-
61	25:32584001-32585000	2	26.9706	5.50907e-08	3.3213e-06	52.3998	ENSECAG00000018213	ASB6	-1	22319	upstream	-	-
62	26:24514001-24515000	1	-25.848	8.54014e-06	0.000250476	40.2564	ENSECAG00000006399/ ENSECAG00000006500	ADAMTS5/ Novel pseudogene	-1/ 1	74652/ 141851	upstream/ downstream	-	-
63	26:28163001-28164000	3	41.8013	0	0	49.7883	ENSECAG00000020848	TIAM1	-1	-	intron	-	15[26]
64	27:25309001-25310000	2	-31.7606	1.64419e-08	1.15068e-06	47.6516	ENSECAG00000008679/ ENSECAG00000016722	ACSL1/ CENPU	1/ 1	7073/ 9976	downstream/ upstream	-	-
65	28:27250001-27251000	1	29.797	1.43504e-05	0.000385193	48.3797	ENSECAG00000014647	STAB2	1	-	coding_sequence; intron	62[74]	62[73]
66	29:13578001-13579000	4	37.4101	1.91613e-12	3.16423e-10	34.0165	ENSECAG00000026119	Novel miRNA	1	36985	downstream	-	-
67	29:18169001-18170000	1	-35.6504	6.69799e-05	0.00133193	35.7061	ENSECAG00000002674	ST8SIA6	1	23709	downstream	-	-
68	X: 9052987-9052987	1 (snp_ASM)	-63.4615	0	0	55.3159	ENSECAG00000009218/ ENSECAG00000014236	EGFL6/ TRAPPC2	1/ -1	228303/ 356906	upstream/ downstream	-	-

## Sheet: Table S2
Table S2. Molecular classification of age DMR linked genes with the use of Panther v 11.0 .
Diff.meth.	Gene Name	Gene Symbol	PANTHER Family/Subfamily	PANTHER Protein Class	Pathway
HYPO	ENSECAG00000010114	RASGRP1	RAS guanyl-releasing protein 1 (PTHR23113:SF174)	guanyl-nucleotide exchange factor(PC00113)	Heterotrimeric G-protein signaling pathway-Gq alpha and Go alpha mediated pathway->Calcium and diacylglycerol-regulated guanine nucleotide exchange factor;;
HYPO	ENSECAG00000006704	FAM98B	Protein FAM98B (PTHR31353:SF11)
HYPO	ENSECAG00000004630	unassigned	Neuronal PAS domain-containing protein 3 (PTHR23043:SF30)	basic helix-loop-helix transcription factor(PC00055);nucleic acid binding(PC00171)
HYPO	ENSECAG00000007565	MDGA2	MAM domain-containing glycosylphosphatidylinositol anchor protein 2 (PTHR23282:SF118)
HYPO	ENSECAG00000011414	DAB1	Disabled homolog 1 (PTHR11232:SF40)	signaling molecule(PC00207)
HYPO	ENSECAG00000022281	DMRTA2	Doublesex- and mab-3-related transcription factor A2 (PTHR12322:SF76)
HYPO	ENSECAG00000010275	GRIK3	Glutamate receptor ionotropic, kainate 3 (PTHR18966:SF174)		Ionotropic glutamate receptor pathway->AMPA/Kainate Receptor;;Ionotropic glutamate receptor pathway->Kainate Receptor;;Ionotropic glutamate receptor pathway->Glutamate receptor, ionotropic kainate 3;;Huntington disease->Kainate receptor;;Metabotropic glutamate receptor group III pathway->AMPA/Kainate Receptor;;;;;;
HYPO	ENSECAG00000020792	CAMTA1	Calmodulin-binding transcription activator 1 (PTHR23335:SF11)	transcription factor(PC00218)
HYPO	ENSECAG00000008556	LDB2	LIM domain-binding protein 2 (PTHR10378:SF8)	transcription cofactor(PC00217)
HYPO	ENSECAG00000022828	C4orf50	Protein Gm1043 (PTHR36866:SF1)
HYPO	ENSECAG00000000658	GPNMB	Transmembrane glycoprotein NMB (PTHR11861:SF11)	cell adhesion molecule(PC00069);membrane-bound signaling molecule(PC00152)
HYPO	ENSECAG00000024078	MKLN1	Muskelin (PTHR15526:SF5)
HYPO	ENSECAG00000002152	ZNF648	Zinc finger protein 648 (PTHR45320:SF1)
HYPO	ENSECAG00000002769	LOC100054852	Epididymal protein Me9 (PTHR16007:SF19)
HYPO	ENSECAG00000011594	KCND3	Potassium voltage-gated channel subfamily D member 3 (PTHR11537:SF182)
HYPO	ENSECAG00000021520	SLC44A3	Choline transporter-like protein 3 (PTHR12385:SF13)	transporter(PC00227)	Nicotinic acetylcholine receptor signaling pathway->high affinity choline transporter;;
HYPO	ENSECAG00000020188	CNN3	Calponin-3 (PTHR18959:SF46)	non-motor actin binding protein(PC00165)
HYPO	ENSECAG00000019096	CACNA1C	Voltage-dependent L-type calcium channel subunit alpha-1C (PTHR10037:SF188)	voltage-gated calcium channel(PC00240);voltage-gated sodium channel(PC00243)	Nicotine pharmacodynamics pathway->Voltage-dependent calcium channel subunit alpha;;Oxytocin receptor mediated signaling pathway->Ca2+ channel;;Alzheimer disease-amyloid secretase pathway->L-type calcium channels;;Gonadotropin-releasing hormone receptor pathway->L-type Ca2+;;Beta2 adrenergic receptor signaling pathway->Ca2+ channel;;Nicotinic acetylcholine receptor signaling pathway->Calcium Chan…
HYPO	ENSECAG00000018293	DCP1B	mRNA-decapping enzyme 1B (PTHR16290:SF5)	transcription cofactor(PC00217)	TGF-beta signaling pathway->Co-activators or corepressors;;
HYPO	ENSECAG00000009572	PLIN3	Perilipin-3 (PTHR14024:SF11)	transfer/carrier protein(PC00219)
HYPO	ENSECAG00000007398	unassigned	SUBFAMILY NOT NAMED (PTHR44044:SF1)
HYPO	ENSECAG00000024560	PTPN11	Tyrosine-protein phosphatase non-receptor type 11 (PTHR19134:SF299)	protein phosphatase(PC00195)	FGF signaling pathway->Src homology 2 domain-containing tyrosine phosphatase 2;;Angiogenesis->Src homology 2 domain-containing tyrosine phosphatase 2;;Interferon-gamma signaling pathway->protein tyrosine phosphatase;;CCKR signaling map->SHP-2;;;;;
HYPO	ENSECAG00000014615	STX2	Syntaxin-2 (PTHR19957:SF36)	SNARE protein(PC00034)	Muscarinic acetylcholine receptor 2 and 4 signaling pathway->N-ethylmaleimide-sensitive factor attachment protein receptor;;Synaptic vesicle trafficking->Syntaxin 1/2;;Nicotinic acetylcholine receptor signaling pathway->N-ethylmaleimide-sensitive factor attachment protein receptor;;;;
HYPO	ENSECAG00000021315	EPHA7	Ephrin type-A receptor 7 (PTHR24416:SF377)
HYPO	ENSECAG00000013971	ATG5	Autophagy protein 5 (PTHR13040:SF2)	membrane trafficking regulatory protein(PC00151)
HYPO	ENSECAG00000010133	unassigned	SUBFAMILY NOT NAMED (PTHR44405:SF1)
HYPO	ENSECAG00000020626	SDK2	Protein sidekick-2 (PTHR44118:SF4)
HYPO	ENSECAG00000012454	XYLT2	Xylosyltransferase 2 (PTHR19297:SF171)	glycosyltransferase(PC00111)
HYPO	ENSECAG00000021173	RHBDD2	Rhomboid domain-containing protein 2 (PTHR45062:SF1)
HYPO	ENSECAG00000018734	GSG1L	Germ cell-specific gene 1-like protein (PTHR10671:SF35)	cytoskeletal protein(PC00085)
HYPO	ENSECAG00000007423	ZKSCAN2	Zinc finger protein with KRAB and SCAN domains 2 (PTHR44428:SF1)
HYPO	ENSECAG00000009376	AQP8	Aquaporin-8 (PTHR19139:SF178)	transporter(PC00227)
HYPO	ENSECAG00000012779	IK
HYPO	ENSECAG00000011014	DND1	Dead end protein homolog 1 (PTHR44977:SF1)
HYPO	ENSECAG00000009732	IL13	Interleukin-13 (PTHR45413:SF1)		Inflammation mediated by chemokine and cytokine signaling pathway->Interleukin 2;;Interleukin signaling pathway->Interleukin;;;
HYPO	ENSECAG00000015637	NREP	Neuronal regeneration-related protein (PTHR17102:SF4)
HYPO	ENSECAG00000018508	NR2F1	COUP transcription factor 1 (PTHR24083:SF46)	nuclear hormone receptor(PC00169);nucleic acid binding(PC00171)
HYPO	ENSECAG00000011079	MRPL19	39S ribosomal protein L19, mitochondrial (PTHR15680:SF9)	ribosomal protein(PC00202)
HYPO	ENSECAG00000000453	GCFC2	GC-rich sequence DNA-binding factor 2 (PTHR12214:SF1)	nucleic acid binding(PC00171);transcription factor(PC00218)
HYPO	ENSECAG00000008974	FOXP1	Forkhead box protein P1 (PTHR11829:SF176)	DNA binding protein(PC00009);transcription factor(PC00218)
HYPO	ENSECAG00000009862	LATS2	Serine/threonine-protein kinase LATS2 (PTHR24356:SF149)	annexin(PC00050);calmodulin(PC00061);non-receptor serine/threonine protein kinase(PC00167);transfer/carrier protein(PC00219)
HYPO	ENSECAG00000016793	unassigned	60S ribosomal protein L7a (PTHR23105:SF102)	ribosomal protein(PC00202)
HYPO	ENSECAG00000005577	GPR39	G-protein coupled receptor 39 (PTHR24243:SF11)	G-protein coupled receptor(PC00021)
HYPO	ENSECAG00000009539	ZPLD1	Zona pellucida-like domain-containing protein 1 (PTHR44347:SF4)
HYPO	ENSECAG00000023081	GNL1	Guanine nucleotide-binding protein-like 1 (PTHR11089:SF24)	G-protein(PC00020);hydrolase(PC00121);nucleic acid binding(PC00171);signaling molecule(PC00207)
HYPO	ENSECAG00000019834	CYP39A1	24-hydroxycholesterol 7-alpha-hydroxylase (PTHR24304:SF2)	oxygenase(PC00177)
HYPO	ENSECAG00000015236	TMEM189	FI14826p (PTHR44178:SF1)		Ubiquitin proteasome pathway->Ubiquitin-conjugating enzyme E2;;Toll receptor signaling pathway->Ubiquitin-conjugating enzyme E2 variant 1;;;
HYPO	ENSECAG00000024933	SPIN1	Spindlin-1 (PTHR10405:SF15)
HYPO	ENSECAG00000013626	unassigned
HYPO	ENSECAG00000006500	ADAMTS5	A disintegrin and metalloproteinase with thrombospondin motifs 5 (PTHR13723:SF37)	extracellular matrix glycoprotein(PC00100);metalloprotease(PC00153);serine protease inhibitor(PC00204)
HYPO	ENSECAG00000016722	CENPU	Centromere protein U (PTHR32222:SF1)
HYPO	ENSECAG00000008679	ACSL1	Long-chain-fatty-acid--CoA ligase 1 (PTHR43272:SF28)	ligase(PC00142)
HYPO	ENSECAG00000002674	ST8SIA6	Alpha-2,8-sialyltransferase 8F (PTHR11987:SF29)
HYPO	ENSECAG00000009218	EGFL6	Epidermal growth factor-like protein 6 (PTHR44771:SF1)
HYPO	ENSECAG00000014236	TRAPPC2	Trafficking protein particle complex subunit 2 (PTHR12403:SF1)	transcription factor(PC00218)
HYPER	ENSECAG00000002486	unassigned
HYPER	ENSECAG00000021238	IGF1R	Insulin-like growth factor 1 receptor (PTHR24416:SF106)		Gonadotropin-releasing hormone receptor pathway->IGF-1R;;Insulin/IGF pathway-mitogen activated protein kinase kinase/MAP kinase cascade->Insulin/Insulin like growth factor;;Insulin/IGF pathway-mitogen activated protein kinase kinase/MAP kinase cascade->Insulin receptor/Insulin like growth factor receptor/insulin related receptor;;Insulin/IGF pathway-protein kinase B signaling cascade->Insulin rec…
HYPER	ENSECAG00000021261	ZCCHC11	Terminal uridylyltransferase 4 (PTHR12271:SF49)	nucleotidyltransferase(PC00174)
HYPER	ENSECAG00000012263	RNF19B	E3 ubiquitin-protein ligase RNF19B (PTHR11685:SF109)	ubiquitin-protein ligase(PC00234)
HYPER	ENSECAG00000011348	POU2AF1	POU domain class 2-associating factor 1 (PTHR15363:SF3)
HYPER	ENSECAG00000025139	MRM1	rRNA methyltransferase 1, mitochondrial (PTHR12029:SF58)	RNA methyltransferase(PC00033)
HYPER	ENSECAG00000026819	NTN1	Netrin-1 (PTHR10574:SF365)	extracellular matrix linker protein(PC00101);receptor(PC00197)	Axon guidance mediated by netrin->Netrin;;Axon guidance mediated by Slit/Robo->Netrin;;;
HYPER	ENSECAG00000015536	MMD2	Monocyte to macrophage differentiation factor 2 (PTHR20855:SF21)	receptor(PC00197)
HYPER	ENSECAG00000019045	FGF18	Fibroblast growth factor 18 (PTHR11486:SF4)	growth factor(PC00112)	FGF signaling pathway->fibroblast growth factor;;
HYPER	ENSECAG00000011756	FBXW11	F-box/WD repeat-containing protein 11 (PTHR44038:SF1)		Wnt signaling pathway->betaTransducin repeat-containing protein;;Hedgehog signaling pathway->Slimb;;Parkinson disease->F-box and WD-40 domain protein 7;;;;
HYPER	ENSECAG00000021795	C9orf135	SUBFAMILY NOT NAMED (PTHR35069:SF1)
HYPER	ENSECAG00000018213	ASB6	Ankyrin repeat and SOCS box protein 6 (PTHR24132:SF17)	transmembrane receptor regulatory/adaptor protein(PC00226)
HYPER	ENSECAG00000020848	TIAM1	T-lymphoma invasion and metastasis-inducing protein 1 (PTHR22826:SF88)	guanyl-nucleotide exchange factor(PC00113);signaling molecule(PC00207)	Ras Pathway->T-cell lymphoma invasion and metastasis;;
HYPER	ENSECAG00000014647	STAB2	Stabilin-2 (PTHR24038:SF0)	extracellular matrix structural protein(PC00103)

## Sheet: Table S3
Table S3. Primer sequences applied for RT-PCR approach.
Gene	Sequence forward 5' to 3'	Sequence reverse 5' to 3'	Exon junction	Total intron size
CAMTA1	CCCATGGAGTCGTCAGCATT	ATGCACTTCTGATCTGGGCA	3866/3867 (reverse primer) on template XM_014737581.1	-
CENPU	CCTTAGTGCCGAGTCCACTG	CGGAAATATCTGAGTCTCCGGC	871/872 (reverse primer) on template XM_005606395.2	7130 (between pos. 25329614 and 25336745 on NC_009170.2)
CNN3	CTCTGCGAACTCATTAACAAGCTAC	TGGCTTCATACCATAAGCCTGA	421/422 (forward primer) on template XM_001490827.5	796 (between pos. 70269213 and 70270010 on NC_009148.2)
DND1	CTGCTCAAGTTCAGCTCGCA	GAGGGACCCACAAACTGCTG	None for forward primer, None for reverse primer	692 (between pos. 36232974 and 36233667 on NC_009157.2)
FAM98B	ACGACTTCTGACATTCCGCT	CCAATTGTTTCGCCTGTTCCA	555/556 (reverse primer) on template XM_014733583.1	2886 (between pos. 149793307 and 149790420 on NC_009144.2)
FBXW11	GCATGCCCAGTGTCAGATG	AGATGATGTTCCATTACTTATCTGC	365/366 (reverse primer) on template XM_005599231.2	40105 (between pos. 9351622 and 9391728 on NC_009157.2)
FOXP1	TCAGATATTGCGCAGAACCA	GATTCGAGAATGGCCTGCCTA	2036/2037 (reverse primer) on template XM_005600445.2	-
GNL1	ACGATGTGTACAGAGCAGCC	CTCCCAGGTGCCTTTCTGTT	1820/1821 (reverse primer) on template XM_001492006.4	-
IGF1R	TCACCATGTGGTGCGGTT	GGAGGTGCTAGGACTGGATT	3321/3322 (forward primer) on template XM_001489765.3	3441 (between pos. 104134333 and 104130891 on NC_009144.2)
IL13	CTGACACGTACTGTAGAGCCC	CAATTTTGGTGTCTCGGGCG	349/350 (forward primer) on template XM_014730431.1	-
IL4	ATTCGTGCATGGAGCTGACT	AGCTGTTGAAGCACCTTTGC	None for forward primer, None for reverse primer	4900 (between pos. 42907742 and 42902841 on NW_001867377.1)
NREP	GGGGCTTTTGTCTGTTGGTC	AGCCTTCCCTCCATTTCCTTG	89/90 (forward primer) on template XM_003362841.3	20240 (between pos. 60047081 and 60067322 on NC_009157.2)
NTN1	AAGGAGGGTTACTACCGCGA	TACAGGTTTTACCAGCGGCG	None for forward primer, None for reverse primer	14850 (between pos. 51905964 and 51920815 on NC_009154.2)
PIP4K2A	TGTTCAGCCACCGTTTGTCT	TGGCAGTTCTTTGGCCTTTT	588/589 (reverse primer) on template XM_014737139.1	5069 (between pos. 13664074 and 13669144 on NC_009172.2)
PLIN3	GTAAAACCTTCTGCTCTGGGGA	GCTGGCTGACGCAATCTGG	392/393 (reverse primer) on template XM_014741070.1	2471 (between pos. 2985108 and 2982636 on NC_009150.2)
POU2AF1	TGGCTACACTGGAGGAAAGC	TTGCTCTGGAGCTGTAGGTTTT	212/213 (reverse primer) on template XM_001501588.5	-
PTPN11	CAACTCAAGCAGCCCCTCAAC	TTTGCACTCCTGCTGTTGTAGT	681/682 (forward primer) on template XM_014742151.1	17255 (between pos. 19883452 and 19866196 on NC_009151.2)
SDHA	CGTTCTTATACTGCCATCAGCA	GCATTATAACATGGGTGGCATT	1612/1613 and 1794/1795 on template XM_001490889	-
RASGRP1	GGCTTCCCTCACAACTTCCA	ATCCCGCAGTCTTTACACCG	1984/1985 (reverse primer) on template XM_005603158.2	-
RNF19B	GCAGGAAGATTCACAGCAGGTAT	ATGCCAGCATAATGGGGACG	639/640 (forward primer) on template XM_005607458.2	1059 (between pos. 24063582 and 24064642 on NC_009145.2)
STX2	TACGAAGAACCCAGCACTCA	CTTCGCTCCCGAAACAGAGT	319/320 (forward primer) on template XM_014727568.1	-
TIAM1	CCTTTCTCACCAGCAACCCA	CCGAGTCCTTGCTGCTGT	3296/3297 (reverse primer) on template XM_005606125.2	14008 (between pos. 28181736 and 28167727 on NC_009169.2)
TMEM189	ATCATGCTGGGTGTCGTTGC	ATGTGATGCTCCCGGAATGG	244/245 (forward primer) on template XM_005604709.2	1209 (between pos. 38240086 and 38238876 on NC_009165.2)
XYLT2	CCTGGAGGAGGACGAGCC	ACTGTCTGTGTCCTTGGAGC	250/251 (forward primer) on template XM_005597937.2	6150 (between pos. 26044361 and 26050512 on NC_009154.2)
ZCCHC11	CCCTAAGAGGAGAAGCAGTTTATT	CTGCTGCCACACTGCTATTC	4262/4263 (forward primer) on template XM_023636815.1	-

## Sheet: Table S4
Table S4. Calculation of methylation percent after clone bisulfite sequencing for age DMRs of STX2 and TIAM1 gene.
A) PM values of CpG sites of region (EquCab2.0 chr8:28141001-28142000) occuring close to 5' end of STX2 locus																				B) PM values of CpG sites of intronic region (EquCab2.0 chr26:28163001-28164000) of TIAM1 locus
	CpG 1	CpG 2	CpG 3	CpG 4	CpG 5	CpG 6	CpG 7	CpG 8	CpG 9	CpG 10	CpG 11	CpG 12	CpG 13	CpG 14	CpG 15	CpG 16	CpG 17	PM over all clones			CpG 1	CpG 2	CpG 3	CpG 4	CpG 5	CpG 6	CpG 7	CpG 8	CpG 9	CpG 10	CpG 11	CpG 12	CpG 13	CpG 14	CpG 15	CpG 16	CpG 17	CpG 18	CpG 19	CpG 20	CpG 21	CpG 22	PM over all clones
Distance in bp from TSS	-698	-816	-858	-863	-872	-875	-916	-926	-953	-976	-1017	-1023	-1057	-1175	-1195	-1243	-1337			Distance in bp from TSS	144124	144106	144102	144086	144054	144025	143988	143982	143971	143961	143950	143898	143896	143893	143884	143872	143863	143844	143840	143831	143806	143775
82 H (7 mos.)	73.7	47.4	87.5	100	100	100	93.3	100	84.2	82.4	100	88.2	88.9	100	75	76.2	86.7	87.26		82 H (7 mos.)	30	75	80	55	70	30	30	10	36.8	30	21.1	20	20	15	10	15	20	20	15	20	20	5	29.45
76 H (8 mos.)	54.5	81.8	91.7	91.7	91.7	91.7	90	100	100	100	100	100	91.7	66.7	87.5	100	100	90.53		76 H (8 mos.)	35	78.9	75	60	95	25	45	40	45	30	40	5	30	15	0	31.6	15	40	30	15	20	20	35.93
77 H (8 mos.)	100	83.3	100	100	100	100	83.3	100	100	91.7	100	91.7	90.9	100	90.9	83.3	100	95.01		77 H (8 mos.)	68.4	78.9	89.5	68.4	73.7	31.6	73.7	47.4	68.4	42.1	36.8	21.1	36.8	21.1	15.8	15.8	31.6	15.8	10.5	26.3	36.8	15.8	42.1
78 H (8 mos.)	63.6	72.7	100	90	100	100	100	100	100	100	ND	90.9	100	100	100	91.7	91.7	93.79		78 H (8 mos.)	44.4	84.2	84.2	68.4	84.2	31.6	61.1	50	66.7	41.2	50	31.6	33.3	22.2	10.5	15.8	47.4	21.1	31.6	36.8	36.8	16.7	44.08
85 H (8 mos.)	42.3	83.3	93.3	100	93.1	96.6	92.9	100	86.7	100	100	85.7	82.8	92.3	100	86.2	95.7	90.05		85 H (8 mos.)	45	90	85	55	80	35	50	20	55	40	40	35	20	35	25	25	40	30	20	20	30	15	40.45
75 H (9 mos.)	75	75	100	100	100	100	100	100	83.3	81.8	100	81.8	91.7	70	62.5	81.8	66.7	86.45		75 H (9 mos.)	0	94.4	94.4	77.8	82.4	33.3	66.7	55.6	72.2	33.3	61.1	33.3	22.2	33.3	11.1	27.8	47.1	44.4	33.3	22.2	33.3	5.6	44.76
35 H (13 yrs.)	ND	42.9	85.7	66.7	71.4	57.1	71.4	85.7	80	83.3	ND	60	60	80	80	80	ND	71.73		35 H (13 yrs.)	85	95	95	100	100	95	90	95	100	90	100	90	95	80	70	90	90	90	95	90	100	80	91.59
43 H (15 yrs.)	37.5	52.6	80	95	90	70	94.7	95	85	95	100	80	75	76.5	66.7	85	83.3	80.08		43 H (15 yrs.)	45	90	85	70	80	60	75	70	75	70	70	75	70	45	50	75	70	70	70	65	70	70	69.09
37 H (16 yrs.)	42.9	26.7	86.7	86.7	66.7	50	57.1	92.9	50	100	ND	100	85.7	86.7	85.7	92.9	100	75.67		37 H (16 yrs.)	80	100	100	100	100	75	100	95	100	89.5	85	75	55	75	50	55	85	75	63.2	75	65	31.6	78.6
36 H (17 yrs.)	20.8	25	79.2	95.7	68.2	75	65	83.3	83.3	60.9	100	95.5	62.5	83.3	84.6	95.8	78.3	73.91		36 H (17 yrs.)	85	84.2	95	80	95	60	84.2	73.7	73.7	77.8	77.8	73.7	77.8	73.7	63.2	72.2	77.8	72.2	75	68.4	75	55.6	75.95
40 H (18 yrs.)	25	0	41.7	50	57.1	30.8	33.3	53.8	50	53.8	100	100	85.7	58.3	54.5	66.7	88.9	55.86		40 H (18 yrs.)	80	73.7	85	85	80	65	70	70	70	70	75	80	75	50	40	75	80	75	75	80	80	75	73.12
42 H (20 yrs.)	25	5.9	76.5	37.5	62.5	35.3	52.9	76.5	70.6	70.6	100	88.2	88.2	61.5	70	76.5	81.2	63.46		42 H (20 yrs.)	78.9	84.2	89.5	84.2	84.2	63.2	73.7	68.4	78.9	78.9	73.7	73.7	68.4	52.6	42.1	72.2	78.9	78.9	78.9	84.2	68.4	73	74.05
ND - not determined because of the lack of SANGER sequencing data due to the homopolymeric stretches of nucleotide sequence after bisulfite conversion of DNA
